## An Estradiol-Inducible Promoter Enables Fast, Graduated Control of Gene Expression in Fission Yeast

Makoto Ohira<sup>1</sup>, David G. Hendrickson<sup>2</sup>, R. Scott McIsaac<sup>2</sup>, Nicholas Rhind<sup>1\*</sup>

1) Biochemistry and Molecular Pharmacology, University of Massachusetts Medical School, 364 Plantation Street, Worcester MA 01605, USA

2) Calico Life Sciences, 1170 Veterans Blvd, South San Francisco, CA 94080, USA

\*Corresponding author

(508) 856-8316

[nick.rhind@umassmed.edu](mailto:nick.rhind@umassmed.edu)

## ABSTRACT

The fission yeast *Schizosaccharomyces pombe* lacks a diverse toolkit of inducible promoters for experimental manipulation. Available inducible promoters suffer from slow induction kinetics, limited control of expression levels and/or a requirement for defined growth medium. In particular, no *S. pombe* inducible promoter systems exhibit a linear dose response, which would allow expression to be tuned to specific levels. We have adapted a fast, orthogonal promoter system with a large dynamic range and a linear dose response, based on  $\beta$ -estradiol-regulated function of the human estrogen receptor, for use in *S. pombe*. We show that this promoter system, termed Z<sub>3</sub>EV, turns on quickly, reaches a maximal induction of over 20 fold, and exhibits a linear dose response over its entire induction range. We demonstrate the utility of this system by regulating the mitotic inhibitor Wee1 to create a strain in which cell size is regulated by  $\beta$ -estradiol concentration. This promoter system will be of great utility for experimentally regulating gene expression in fission yeast.

## INTRODUCTION

Cell biological studies often take advantage of inducible promoters, ideally ones that are orthogonal to the system of interest. However, the inducible promoters available for the fission yeast *Schizosaccharomyces pombe* all have significant drawbacks ((Forsburg, 1993) and Table S1). Inducible promoters frequently used in *S. pombe* research include the *S. pombe nmt1* promoter and a tetracycline-regulated Cauliflower Mosaic Virus (CaMV) promoter. The *nmt1* gene has a strong promoter, which is regulated by thiamine, and has been engineered into a series of variants with low to high expression levels (Basi et al., 1993). The disadvantages of the *nmt1* promoter include a high constitutive activity, even in its weakest version, pleiotropic effects of induction by thiamine removal, and a long, 16-hour induction time. The synthetic tetO/CaMV promoter was designed to avoid such disadvantages by combining a tet operator with the CaMV 35S promoter (Faryar and Gatz, 1992). However, tetO/CaMV expression is comparable to only the weakest *nmt1* promoter variant and also takes between 9 to 12 hours to induce (Forsburg, 1993). More recently, the endogenous *urg1* promoter has been shown to have favorable induction and repression kinetics (Watt et al., 2008), but it suffers from the disadvantages of being regulated by uracil (which requires growth in defined media and has other transcriptional effects), working best only at its endogenous locus (Watson et al., 2013), and not having a well-characterized dose response.

McIsaac *et al.* recently designed and implemented a synthetic promoter system, named Z<sub>3</sub>EV, in *Saccharomyces cerevisiae*. This system is characterized by rapid and tunable induction of a desired target gene with the exogenous mammalian hormone  $\beta$ -estradiol. In *S. cerevisiae*, this system was shown to have a large dynamic range with minimal off-target activity (McIsaac et al., 2013, 2014). To increase the array of gene expression tools available in fission yeast, we have adapted the Z<sub>3</sub>EV system for use in *S. pombe*.

The Z<sub>3</sub>EV artificial transcription factor is a fusion of three domains: the Zif268 zinc-finger DNA binding domain containing three zinc fingers, the human estrogen receptor ligand-binding domain, and the VP16 viral activator domain (McIsaac et al., 2013, 2014). The estrogen receptor is an effective allosteric switch: binding of  $\beta$ -estradiol to the estrogen receptor disrupts its interaction with Hsp90 and causes rapid nuclear import of the Z<sub>3</sub>EV protein. The Z<sub>3</sub>EV-responsive promoter (Z<sub>3</sub>EVpr) consists of six Zif268 DNA binding sequences inserted into a modified *S. cerevisiae* GAL1 promoter from which the canonical Gal4 binding sites have been removed. Target genes placed immediately downstream of Z<sub>3</sub>EVpr in a strain expressing Z<sub>3</sub>EV become conditional expressed upon  $\beta$ -estradiol addition to the culture. A GFP reporter driven by the Z<sub>3</sub>EV system in *S. cerevisiae* plateaued at about ~10-fold fluorescence over background when induced with 100 nM  $\beta$ -estradiol (McIsaac et al., 2013). GFP mRNA increased to between 50-100 fold over background approximately 20 minutes after induction with 1  $\mu$ M of  $\beta$ -estradiol (McIsaac et al., 2013, 2014). Though *S. cerevisiae* and *S. pombe* diverged ~420 million years ago (Sipiczki, 2000), the conservation of Hsp90 (which is present in all organisms except Archaea (Gupta, 1995)) suggested the Z<sub>3</sub>EV system may also function in *S. pombe*.

In this manuscript, we describe the successful adaptation of the Z<sub>3</sub>EV system for use in *S. pombe* and a set of constructs to make its implementation straightforward. We find that the Z<sub>3</sub>EV system enables rapid, titratable induction of target gene expression in *S. pombe*. Increasing  $\beta$ -estradiol concentration results in a proportional increase of target gene expression. We use RNA-seq to show that the system has few off-target effects and thus can be used to regulate genes of interest with minor perturbations to cell physiology. Finally, we demonstrate that this system enables the study of native gene function: induction of the cell cycle regulator Wee1 by Z<sub>3</sub>EV results in dose-dependent increase in cell size. Collectively, these results highlight the utility of Z<sub>3</sub>EV to flexibly control gene expression in *S. pombe* without the significant drawbacks of previous synthetic systems.

## MATERIALS AND METHODS

### Strains, media, and growth conditions

We used standard fission yeast culture and growth conditions (YES media, 30°C) as previously described (Forsburg and Rhind, 2006).  $\beta$ -estradiol (E2758, Sigma Aldrich) was dissolved in ethanol at 10mM and stored at -20°C.  $\beta$ -estradiol was added to media from this 10mM stock to the final concentration. An equivalent volume of ethanol was added to untreated control cultures.

### Plasmid and strain construction

To create the Z<sub>3</sub>EV protein integration plasmid (pFS461), we used Gibson assembly (NEB) to join two fragments: the Z<sub>3</sub>EV CDS was amplified from DBY19011 (McIsaac et al., 2014) using primers MO198 and MO199 (Table 3), the *leu1* integrating vector (pFS181) (Sivakumar et al.,

2004), which contains a strong constitutive *adh1* promoter, was amplified using primers MO197 and MO200. pFS461 was cleaved uniquely within the *leu1* ORF using XhoI and transformed into parent strain yFS110 to yield the transformant yFS949.

The plasmid containing GFP-NLS expressed from the Z<sub>3</sub>EV promoter (pFS462) was created by Gibson assembly (NEB) of four fragments: the Z<sub>3</sub>EV promoter sequence was amplified from pMN9 (McIsaac et al., 2013) using primers MO219 and MO220, the *his7* integration vector was amplified from pBSSK-His7(F) (Apolinario et al., 1993) using MO218 and MO225, the GFP-NLS CDS was amplified from pSO745 (courtesy of Snezhana Oliferenko) using MO221 and 222 and inserted up-stream of the Z<sub>3</sub>EV promoter; the *leu1* C-terminal sequence was amplified from *S. pombe* genomic DNA using MO223 and MO224, and appended downstream of the GFP-NLS sequence. pFS462 was cleaved uniquely within the *his7* ORF using AflII (NEB) and transformed into yFS949, to yield transformant strain yFS951. The *S. pombe* genome contains no potential Zif268 binding sites when searched with NCBI BLASTN under normal or nearest match specificity.

The plasmid containing beetle luciferase expressed from the Z<sub>3</sub>EV promoter (pFS465) was created by Gibson assembly (NEB) to replace GFP with luciferase in pFS462. The beetle luciferase ORF was amplified from pFS470 using primers MO236 and MO237; the pFS462 vector was amplified with MO235 and MO238. pFS465 was cleaved uniquely at the *his7* ORF using AflII and transformed into the Z<sub>3</sub>EV protein-expressing strain yFS948. This intermediate strain was crossed with a strain constitutively expressing renilla luciferase as a translational fusion with *ade4* (yFS871) to yield our dual-luciferase strain (yFS954).

## Flow cytometry

GFP fluorescence was quantified using a Becton Dickinson FACScan flow cytometer. Cells were harvested at specified time points after induction with  $\beta$ -estradiol, spun down at 1 kG for 5 minutes at 4°C, washed with water, quickly spun down at RT, and resuspended in PBS. For each sample, we recorded the FL1 (green fluorescence) and FSC (forward scatter) from 10,000 cells.

## RNA extraction and RT-qPCR

10 ODs of cells were harvested at specified time points after induction, spun down at 1 kG for 5 minutes at 4°C, washed with water, briefly spun down at RT, flash frozen in LN<sub>2</sub>, and stored at -20°C. RNA was extracted from the cell pellet by bead beating with Trizol (Ambion) according to the manufacturer's instructions, followed by isopropyl alcohol precipitation, ethanol wash, and stored at -20°C. The RNA was treated at a ratio of 1ug of RNA per unit of Amp-grade DNase I (Invitrogen) per the manufacturer's instructions. Gene-specific cDNA was obtained using Superscript III (Invitrogen) per the manufacturer's instructions and the following primers: MO233 for GFP, MO191 for *cdc2*, and LD8 for *ade4*. qPCR primers MO233 and MO221 yielded an amplicon length of 290nt within the GFP CDS. Primers MO192 and MO193 yielded an amplicon of 152nt within the *cdc2* CDS. Primers LD9 and LD10 yielded amplicon size 163nt within the *ade5* CDS. BLASTing these RT and qPCR primers against the *S. pombe* genome

showed that they were either unique to the target gene, or in the case of GFP had no match within the genome and were unique to the GFP CDS. Specificity of the primers was shown via melt curve derivative, and standard curves were generated for all primer sets. qPCR was performed in 20  $\mu$ L reactions containing 5 $\mu$ L of cDNA, 10 $\mu$ L 2X SYBR FAST qPCR Master Mix Universal (KK4601, KAPA Biosystems), 0.4 $\mu$ L of each 10 $\mu$ M primer and 4  $\mu$ L water. Reactions were run in technical triplicates on a Bio-Rad CFX system, and Cq values were obtained via the Bio-Rad CFX Manager.

### Dual luciferase assay

Dual luciferase assay (Promega) was performed according to manufacturer's instructions. Ten ODs of cells were suspended in 200  $\mu$ L 1x Passive Lysis Buffer (PLB) and approximately 200  $\mu$ L of zirconia/silica beads (Biospec). The cells were lysed by vortexing for 10 minutes at maximum RPM at 4°C. The lysate was spun at 16 kG at 4°C for 5 minutes. Triplicate 10  $\mu$ L samples of cleared lysate were loaded into separate wells of a 96 well plate, each with 50  $\mu$ L of pre-dispensed Luciferase Assay Reagent II. The luminometer was programmed for a 2 second rest and a 10 second measurement. 50 $\mu$ L of Stop and Glow Reagent was dispensed, followed by the same rest and measurement.

### Curve fitting

Dose-response data was fit with

$$y = \text{base} + ((\text{max} - \text{base}) * (x^{\text{slope}} / (x^{\text{slope}} + \text{EC}_{50}^{\text{slope}})))$$

where base is the reported level at 0 dose, max is the reporter level at saturating dose,  $\text{EC}_{50}$  is the dose (effector concentration) at 50% reporter expression, and slope is the ratio of change in reporter expression relative to dose (DeLean et al., 1978).

Response-kinetics data was fit with

$$y = \text{base} + ((\text{max} - \text{base}) * (1 - e^{-(t - \text{lag}) / \text{half-life}}))$$

where base is the reporter level at  $t = 0$ , which is set to 1, max is the reporter level at the end of the time course, lag is the time until the reported level begins to increase, and half-life is the half-life of the reporter. Note that this observed half-life combines both the degradation of the reporter and its dilution due to cell growth during the time course.

Fits were calculated in Igor Pro 6.37 (Wavemetrics).

### RNA-seq

10 ODs of cells were harvested before and after 3 hours of induction with 1  $\mu$ M  $\beta$ -estradiol in three biologically independent replicates. RNA was extracted as described above. RNA quality was confirmed by denaturing gel and Bioanalyzer (Agilent) analysis.

Ribosomal RNA was depleted from 1  $\mu$ g of total RNA using Ribo-Zero™ Yeast Magnetic Gold (Illumina), followed by a cleanup using Agencourt RNAClean XP beads (Beckman Coulter) and elution with 19.5  $\mu$ L of Elute, Prime, Finish mix from the TruSeq stranded mRNA Sample Preparation Kit (Illumina). We performed library construction per the vendor's instructions starting with cDNA synthesis. We pooled the resulting barcoded cDNA libraries and subjected them to 70 base pair paired-end sequencing on an Illumina NextSeq.

Sequencing reads were aligned to the Ensembl EF2 *S. pombe* genome assembly accessed from Illumina's [iGenome](http://support.illumina.com/sequencing/sequencing_software/igenome.html) database <[http://support.illumina.com/sequencing/sequencing\\_software/igenome.html](http://support.illumina.com/sequencing/sequencing_software/igenome.html)> (modified to include GFP) and to the EF2 transcriptome (also modified to include GFP) using Tophat2 with the options -I 10000 -i 10 to constrain splice junction searching to < 10,000 bp and > 10 bp. We estimated transcript abundance and called differentially expressed genes using Cuffdiff2 with a false discovery rate of 5% (Trapnell et al., 2009). We filtered out genes with no counts or noisy signal (coefficient of variation > 0.5) in either the untreated and treated samples. Sequence data will be available from the NIH GEO.

Gene enrichment analysis was conducted on the AnGeLi server (Bitton et al., 2015).

## RESULTS

### Z<sub>3</sub>EV Functions in *S. pombe*

To adapt the Z<sub>3</sub>EV system to *S. pombe*, we expressed the Z<sub>3</sub>EV protein from the strong constitutive *adh1* promoter on a plasmid (pFS461) integrated at the *leu1* locus and expressed GFP-NLS from Z<sub>3</sub>EVpr on another plasmid (pFS462) integrated at the *his7* locus (Figure 1A). Upon addition of  $\beta$ -estradiol, Z<sub>3</sub>EV translocates into the nucleus and drives GFP expression (Figures 1B and 1C). This Z<sub>3</sub>EV-driven GFP system enabled us to confirm the function of the Z<sub>3</sub>EV system in *S. pombe* and quantitatively characterize its expression kinetics. Upon addition of 1  $\mu$ M  $\beta$ -estradiol, we observed an approximately 4-fold increase in fluorescence signal over 5 hours of induction (Figure 1D). Fitting an induction-kinetics model to the data indicates that GFP take about 1 hour to express, consistent with the slow maturation of GFP fluorescence (Heim et al., 1994). The fit also allows us to infer that the half-life of GFP in cells is about 2 hours. However, this observed half-life combines both the protein degradation rate and its dilution rate due to cell growth. The fact that the yeast doubling time of about 2 hours suffices to explain the observed GFP half-life suggests that the rate of GFP degradation is significantly slower than its rate of dilution. The range of GFP expression from Z<sub>3</sub>EVpr is within the range of endogenous gene expression and between the strengths of the wild type and medium strength *nmt1* promoters (Basi et al., 1993) (Figure 1E).

## **Z<sub>3</sub>EV Expression is Linearly Dependent on $\beta$ -Estradiol**

To characterize the dose response of Z<sub>3</sub>EV to  $\beta$ -estradiol in *S. pombe*, we assayed Z<sub>3</sub>EV-dependent expression over 4 logs of  $\beta$ -estradiol concentration. We observed only background fluorescence below 1 nM, and an upper plateau of approximately 4-fold induction at or above 100 nM (Figure 1F). The background fluorescence below 1 nM was similar in un-induced cells, cells expressing Z<sub>3</sub>EV protein without a reporter, and wild-type cells (Figures 1C and 1F). Between 1 nM and 100 nM  $\beta$ -estradiol, we observed a linear dose-response of GFP expression to  $\beta$ -estradiol concentration (Figure 1F). Fitting with a sigmoidal dose-response curve shows a low nanomolar EC<sub>50</sub> (effector concentration at 50% response) and a slope (the ratio of change in response relative to dose) in the neighborhood of 1.

Although the GFP reporter allows rapid validation of the system and single-cell analysis of expression, the background auto-fluorescence of cells obscures the full dynamic range of Z<sub>3</sub>EV-dependent expression. To more accurately measure the dynamic range of the Z<sub>3</sub>EV system, we used a beetle luciferase reporter. Luciferase has excellent signal-to-noise characteristics and by using a Z<sub>3</sub>EV:beetle luciferase reporter strain constitutively expressing renilla luciferase (Voon et al., 2005a), we have an internal control for dual-luciferase quantification experiments. Luciferase expression showed similar kinetic and dose-response profiles to the GFP reporter (Figures 2A,B). However, the dynamic range of the luciferase luminescence was much larger, with maximal expression over 20-fold greater than repressed levels (Figure 2B).

## **mRNA Expression is Rapidly Induced by Z<sub>3</sub>EV Activation**

To directly assay the transcriptional activity of Z<sub>3</sub>EVpr in response to Z<sub>3</sub>EV activation, we measured changes in reporter mRNA levels. A response-kinetics assay using RT-qPCR is similar to the luciferase assay with a 20-fold dynamic range peaking at 2 hours (Figure 3A). However, induction at the mRNA level is much faster than either of the reporter proteins. Induction of GFP transcripts was evident by 5 minutes after  $\beta$ -estradiol addition (Figure 3A). Fitting an induction-kinetics model to the data indicates that there is no measurable lag in mRNA expression and that the time taken to reach maximum expression is limited solely by the relatively long, ~40 minute, half-life of the GFP mRNA. Thus, the RT-qPCR-based assay provides a more sensitive measure of promoter activity than the fluorescence- or luminescence-based assays, and demonstrates the rapid transcriptional response of the Z<sub>3</sub>EV system. Nonetheless, the dose-response parameters of all three assays are similar, with low nanomolar EC<sub>50</sub>s and slopes near 1.

## **Growth effects of Z<sub>3</sub>EV Induction**

There is some evidence that the VP16 domain can be toxic in yeast (Berger et al., 1992; McIsaac et al., 2011; Remacle et al., 1997; Silverman et al., 1994). To test the effect of the Z<sub>3</sub>EV protein (which includes a VP16 domain) on fitness, we compared the growth of wild type cells to cells

expressing the Z<sub>3</sub>EV protein and to cells expressing both Z<sub>3</sub>EV protein and Z<sub>3</sub>EVpr-GFP under varying levels of  $\beta$ -estradiol induction.

Growth rates at various  $\beta$ -estradiol doses were measured and culture doubling times were calculated (Figure 4A). Wild-type cells are unaffected by addition of  $\beta$ -estradiol. In contrast, both the Z<sub>3</sub>EV protein-only expressing strain and the strain containing both Z<sub>3</sub>EV and a GFP reporter, showed a similar modest increase of doubling time with increasing  $\beta$ -estradiol (Figure 4A). However, the decrease in growth rate is less than 10% at 100 nM  $\beta$ -estradiol and even at 10  $\mu$ M, where the reduction in growth rate is about 25%, the cells appear healthy. Since the EC<sub>50</sub> for the reduction in growth rate is 10- to 30-fold higher than that for target-gene expression and the reduction only becomes substantial at concentrations above those required for maximal target-gene expression, the Z<sub>3</sub>EV system can be used over its full dynamic range with only a slight effect on growth rate.

### **Z<sub>3</sub>EV has Few Off-Target Effects**

To investigate the genome-wide effect of the  $\beta$ -estradiol induced Z<sub>3</sub>EV system in *S. pombe*, we used RNA-seq to profile the transcriptomes of our Z<sub>3</sub>EV strain under uninduced and induced conditions. Most genes remained unaffected by the induction of the Z<sub>3</sub>EV system with 1  $\mu$ M of  $\beta$ -estradiol. Only 265 out of 5992 expressed loci showed greater than 1.32-fold change in expression after induction, a cutoff set so that genes reported as differentially expressed have a q value (FDR-corrected p value) of less than 0.05 (Table S2). Approximately equal numbers of genes showed an increase versus a decrease in expression. The largest increase was GFP mRNA, which showed a 4.9-fold increase (Figure 4B). The gene with the largest decrease in expression was *pho84*, at 3.2 fold.

Gene ontology enrichment analysis showed no significant enrichment within the set of genes that increased with Z<sub>3</sub>EV induction. The set of genes that decreased with Z<sub>3</sub>EV induction showed between 4-7 fold enrichment for various cytoplasmic translation or amino acid metabolic factors. It is unclear if the decrease in expression of genes associated with translation and amino acid biosynthesis is a cause or consequence of the reduced growth rate observed at 1  $\mu$ M  $\beta$ -estradiol.

### **Z<sub>3</sub>EV Regulation of *wee1* Expression Creates $\beta$ -Estradiol-Dependent Cell Size Control**

To demonstrate the experimental utility of the Z<sub>3</sub>EV promoter, we constructed a strain in which expression of the mitotic inhibitor Wee1 is under control of the Z<sub>3</sub>EV promoter. Wee1 is a dose-sensitive regulator of mitotic entry and thus cell size (Russell and Nurse, 1987). We therefore expected that by regulating Wee1 expression, we would be able to regulate the size of cells at division. To do so, we replaced the endogenous *wee1* promoter with the Z<sub>3</sub>EV promoter in a strain expressing the Z<sub>3</sub>EV protein. In response to increasing doses of  $\beta$ -estradiol, cell size at division increases from 13  $\mu$ m to 28  $\mu$ m with a dose-response similar to those of the Z<sub>3</sub>EV-responsive fluorescent and luminescent reporters (Figure 5).



## DISCUSSION

Research using the fission yeast *S. pombe* has been hampered by the lack of convenient systems for regulation of gene expression. An ideal system would have a large dynamic range over which expression could be controlled by varying inducer concentration, would be rapidly induced in response to addition of inducer, would be based on an exogenous regulatory system, so as to have minimal incidental transcriptional effects, and would function in rich media, for cost efficiency. To establish such a system, we implemented a  $\beta$ -estradiol-regulated transcription system based on the Z<sub>3</sub>EV synthetic transcription factor, which was originally developed for use in *S. cerevisiae*, and showed that it operates successfully in *S. pombe*.

Maximal Z<sub>3</sub>EV activation by saturating levels of  $\beta$ -estradiol (> 100 nM) induces about a 20-fold increase in transcription from genes driven by Z<sub>3</sub>EVpr, the Z<sub>3</sub>EV responsive promoter (Figures 2A,B and 3A,B). This dynamic range compares favorably with other inducible promoters in *S. pombe*, which mostly show between 10- and 25-fold induction (Forsburg, 1993; Watt et al., 2008), with the exception of the full-strength *nmt1* promoter which can induce up to 300-fold, often resulting in pathological overexpression.

The level of expression from Z<sub>3</sub>EVpr is within the range of normal *S. pombe* gene expression, with its uninduced level being just less than the *wee1* promoter and its maximal induced level being about 30% of maximal *nmt1* expression (Figures 1E and 5). However, the absolute level of expression from any promoter will depend on the stability of the target gene's message and protein product. For applications that require lower basal expression levels, gene expression could be modified by adding mRNA or protein destabilizing elements (Voon et al., 2005b), as has been done with the *urg1* promoter (Watson et al., 2013).

One of the major drawbacks of the *nmt1* promoter—the most commonly used promoter in *S. pombe* experiments—is its slow activation kinetics, requiring 16 hours to induce. Z<sub>3</sub>EV induces quickly, with mRNA expression evident at 5 minutes after induction (Figure 3A). Modeling of its induction kinetics suggests that there is no measurable lag in mRNA expression. The lag seen in the expression the GFP and luciferase reporter proteins are presumably due to their slow maturation kinetics. The modeling further suggests that the time to reach maximum mRNA expression is determined solely by the half-life of the target mRNA.

A major advantage of the Z<sub>3</sub>EV system over other expression systems available in *S. pombe* is that it has a linear dose response over the full range of its induction (Figures 1F, 2B, 3B and 5B). By titrating the concentration of  $\beta$ -estradiol, it is possible to obtain any expression level within its range, making the system convenient for controlling expression levels and allowing levels to be changed at will, affording tremendous experimental flexibility. Other *S. pombe* promoter systems have been modified to produce series of promoters of varying strengths (Basi et al., 1993; Watson et al., 2013). However, this approach allows access to only a fixed number of expression levels and does not allow flexible control of expression within one strain. The linear dose response of Z<sub>3</sub>EV, in combination with the use of mRNA and protein destabilization elements to modify the absolute range of Z<sub>3</sub>EVpr-driven expression for any particular target

gene, will afford a wide range of expression levels for any target protein (Voon et al., 2005b; Watson et al., 2013).

Another significant advantage of the Z<sub>3</sub>EV system is that, being entirely foreign to *S. pombe*, it has very few off-target transcriptional effects. Only 265 genes show statistically significant changes in expression at the  $q < 0.05$  level, which corresponds to a change of greater than 1.32 fold, and only 33 genes had a greater than 2-fold change in expression (Table S2). The statistically significantly up regulated genes did not show significant enrichment in any particular classes of genes. The down regulated genes showed enrichment for various cytoplasmic translation or amino acid metabolic factors. Since these genes are not enriched for even weak matches to the Z<sub>3</sub>EV binding site, it seems unlikely that they are direct targets. Instead their down regulation may reflect the slight reduction in growth rate at 1  $\mu$ M  $\beta$ -estradiol (Figure 4A).

Even though activation causes only slight off-target changes in gene expression, it does have modest effects on cellular growth rates (Figure 4A). At 100 nM  $\beta$ -estradiol, the lowest concentration that induces maximal expression from Z<sub>3</sub>EVpr, cells double 10% slower than untreated cells; at 10  $\mu$ M, they grow 25% slower, although they appear healthy. The presence of only minor off-target effects, along with the fact that growth rate continues to decline at doses above those required for maximal specific transcription induction, suggests that the mild growth defect induced by  $\beta$ -estradiol is not due to specific transcriptional effects but may be due to non-specific disruption of chromatin structure.

A final advantage of the Z<sub>3</sub>EV system is that it does not require specific media and works in both rich and synthetic medium (Figure 1E). This fact allows for increased experimental flexibility and is economically advantageous relative to promoters that require synthetic media.

The utility of the Z<sub>3</sub>EV system in *S. pombe* is demonstrated by its ability to regulate cell size when used to drive expression of the mitotic inhibitor Wee1. Wee1 is a protein kinase that negatively regulates Cdc2, the master regulator of mitosis (Nurse, 1990). Wee1 is a dose dependent regulator of entry into mitosis and thus the level of Wee1 expression controls the size of cells at division. (Russell and Nurse, 1987). We replaced the *wee1* promoter with Z<sub>3</sub>EVpr and showed that we could regulate cell size at division from 13  $\mu$ m to 28  $\mu$ m by titrating  $\beta$ -estradiol concentration (Figure 5). Although a number of strategies have been previously used to elongate cells, these approaches use disruptive treatments, such as temperature shift or checkpoint activation, and generally result in acute G2 arrest, so arbitrary intermediate cell sizes have not been experimentally accessible. Thus, beyond being a simple demonstration of the utility of the Z<sub>3</sub>EV system in *S. pombe*, this strain will be a useful tool for the study of cell size biology.

Given the limited existing repertoire of promoters available for the *S. pombe*, and the multiple advantages of the Z<sub>3</sub>EV system, we believe that it will prove to be an invaluable tool for future functional studies in this important model organism.

## FUNDING

This work was supported by the National Institutes of Health [GM098815 to NR].

## **AUTHOR CONTRIBUTIONS**

Conceptualization: MO,NR; Methodology: MO,DGH,RSM,NR; Formal Analysis: MO,DGH,RSM,NR; Investigation: MO,DGH; Data Curation: RSM,NR; Writing – Original Draft: MO,NR; Writing – Review & Editing: MO,DGH,RSM,NR; Visualization: MO,DGH,RSM,NR; Supervision: RSM,NR; Project Administration: NR; Funding Acquisition: RSM,NR

## **ACKNOWLEDGEMENTS**

We thank Snezhana Oliferenko for the GFP-NLS construct, Dan Keifenheim for the luciferase strains, members of the Rhind lab for helpful suggestions throughout this project, Tony Carruthers for help with kinetic curve fitting, and Damien Coudreuse and Sarah Dixon for helpful comments on the manuscript.

## FIGURES

### Figure 1. Z<sub>3</sub>EV Regulates Dose-Dependent Expression in *S. pombe*

(A) Schematic representation of the  $\beta$ -estradiol-induced promoter constructs.

(B) Schematic representation of the  $\beta$ -estradiol-induced promoter system. The system was designed such that (1) added  $\beta$ -estradiol (2) binds to Z<sub>3</sub>EV protein leading to (3) translocation into the nucleus, (4) transcriptional activation of the GFP reporter gene, (5) GFP expression, and (6) translocation of GFP back into the nucleus.

(C) Z<sub>3</sub>EV-dependent expression of GFP. Cells expressing Z<sub>3</sub>EV and containing the Z<sub>3</sub>EVpr:GFP expression cassette (yFS951) and wild-type cells (yFS110) were grown with or without 1  $\mu$ M  $\beta$ -estradiol for 4 hours and imaged for green fluorescence. The outlines of the cells, taken from bright-field images, are also shown.

(D) Z<sub>3</sub>EVpr:GFP induction kinetics. *adh1::Z<sub>3</sub>EV Z<sub>3</sub>EVpr:GFP* cells (yFS951) were induced with 1  $\mu$ M  $\beta$ -estradiol and sampled every 20 minutes. Mean fluorescence of cells in the culture relative to uninduced cells was measured by flow cytometry.  $n=3$ ; the mean and standard error bars are shown. The curve is an induction-kinetics model fit to the data from which the induction parameters were extracted.

(E) Z<sub>3</sub>EVpr:GFP expression levels relative to other promoters. wt (yFS105), *rpa1*-GFP (yFS831), *adh1::Z<sub>3</sub>EV Z<sub>3</sub>EVpr:GFP* (yFS951), *nmt41::tub1*-GFP (yFS386), *nmt1::tub1*-GFP (yFS387) and *adh1*-GFP (yFS313) cell were grown in the rich medium (YES) or synthetic medium (EMM). The ZEV promoter was induced with 1  $\mu$ M  $\beta$ -estradiol. The *nmt1* promoter, or a moderate-strength mutant thereof (*nmt41*), was repressed with 15  $\mu$ M thiamine (B1). Cells were assayed for mean fluorescence relative to wild-type background fluorescence by flow cytometry.  $n=3$  for all strains; the mean and standard error bars are shown.

(F) Dose response of Z<sub>3</sub>EVpr:GFP expression. *adh1::Z<sub>3</sub>EV Z<sub>3</sub>EVpr:GFP* cells (yFS951) were induced with various concentrations of  $\beta$ -estradiol, sampled after 5 hours and assayed for mean cellular fluorescence relative to uninduced cells by flow cytometry.  $n=3$ ; the mean and standard error bars are shown. The curve is a sigmoidal dose-response model fit to the data from which the dose-response parameters were extracted.

### Figure 2. Z<sub>3</sub>EV Regulates Expression Over a Large Dynamic Range

(A) Z<sub>3</sub>EVpr:bLuc induction kinetics. Cells expressing Z<sub>3</sub>EV, containing the Z<sub>3</sub>EVpr:bLuc expression cassette and expressing a control Ade4-rLuc fusion (yFS954) were induced with 100 nM  $\beta$ -estradiol and sampled as indicated. Mean beetle luciferase activity of cells relative to renilla luciferase activity was measured by luminometry and normalized to uninduced cells.  $n=3$ ; mean and standard error bars are shown. The curve is an induction-kinetics model fit to the data from which the induction parameters were extracted.

(B) Dose response of Z<sub>3</sub>EVpr:bLuc expression. Z<sub>3</sub>EV Z<sub>3</sub>EVpr:bLuc Ade4-rLuc cells (yFS954) were induced with various concentrations of  $\beta$ -estradiol, sampled after 4 hours and assayed for

mean beetle luciferase activity of cells relative to renilla luciferase activity by luminometry. Data was normalized to the uninduced sample.  $n=3$  for all points except 720 minutes, for which  $n=1$ ; mean and standard error bars are shown. The curve is an sigmoidal dose-response model fit to the data from which the dose-response parameters were extracted.

### Figure 3. Z<sub>3</sub>EV Exhibits Rapid Induction Kinetics

(A) Z<sub>3</sub>EVpr:GFP mRNA induction kinetics. Z<sub>3</sub>EV Z<sub>3</sub>EVpr:GFP cells (yFS951) were induced with 1  $\mu$ M  $\beta$ -estradiol and sampled as indicated. GFP mRNA levels relative to *cdc2* mRNA were measured by qPCR and normalized to uninduced cells. Early time points are shown in the inset graph.  $n=3$ ; the mean and standard error bars are shown. The curve is an induction-kinetics model fit to the data from which the induction parameters were extracted.

(B) Dose response of Z<sub>3</sub>EVpr:GFP mRNA expression. Z<sub>3</sub>EV Z<sub>3</sub>EVpr:GFP cells (yFS951) were induced with various concentrations of  $\beta$ -estradiol, sampled after 5 hours and assayed for GFP mRNA levels relative to *ade4* mRNA levels by qPCR. Data was normalized to the uninduced sample.  $n=3$ ; the mean and standard error bars are shown. The curve is an sigmoidal dose-response model fit to the data from which the dose-response parameters were extracted.

### Figure 4. Global Effects of Z<sub>3</sub>EV Activity on Cell Growth and Gene Expression

(A) Activation of Z<sub>3</sub>EV causes a modest reduction in growth rate. Growth curves of wild-type (yFS110), Z<sub>3</sub>EV (yFS949) and Z<sub>3</sub>EV Z<sub>3</sub>EVpr:GFP (yFS951) strains at varying concentrations of  $\beta$ -estradiol. Growth was measured by optical density over 11 hours. The curve is an sigmoidal dose-response model fit to the data from which the dose-response parameters were extracted.

(B) Activation of Z<sub>3</sub>EV causes few off-target effects on mRNA expression. RNA-seq FPKM values of induced vs un-induced Z<sub>3</sub>EV Z<sub>3</sub>EVpr:GFP cells (yFS951). GFP mRNA is highlighted in green.

### Figure 5. Z<sub>3</sub>EV-Dependent Regulation of Cell Size.

(A) Z<sub>3</sub>EVpr:*wee1* regulates cell size in response to  $\beta$ -estradiol. Wild-type cells (yFS105) and cells expressing Z<sub>3</sub>EV and Z<sub>3</sub>EVpr:*wee1* (yFS970) were grown for 6 hours in varying concentrations of  $\beta$ -estradiol.

(B) Quantitation of the length of cells at septation of cultures shown in 5A. The curve is an sigmoidal dose-response model fit to the data from which the dose-response parameters were extracted.

**Table 1: Strains**

| Strain | Genotype                                                        | Reference               |
|--------|-----------------------------------------------------------------|-------------------------|
| yFS109 | h+ leu1-32 ura4-D18 ade6-210 his7-366                           | lab stock               |
| yFS110 | h- leu1-32 ura4-D18 ade6-210 his7-366                           | lab stock               |
| yFS313 | h- leu1-32 ura4-D18 ade6-210 his7-366 adh1:GFP(KanMX)           | lab stock               |
| yFS386 | h- leu1-32 ura4-D18 nmt41-tubA-GFP                              | lab stock               |
| yFS387 | h- leu1-32 ura4-D18 nmt1-tubA-GFP                               | lab stock               |
| yFS831 | h- leu1-32 ura4-D18 rpa1-GFP-hphMX6                             | lab stock               |
| yFS871 | h- leu1-32 ura-D18 ade4-rLuc(NatMX)                             | lab stock               |
| yFS945 | h- ura4-D18 leu1::pFS461                                        | this paper <sup>1</sup> |
| yFS948 | h+ ura4-D18 ade6-210 his7-366 leu1::pFS461                      | this paper <sup>1</sup> |
| yFS949 | h- ura4-D18 ade6-210 his7-366 leu1::pFS461                      | this paper <sup>1</sup> |
| yFS951 | h- ura4-D18 ade6-210 leu1::pFS461 his7::pFS462                  | this paper <sup>1</sup> |
| yFS954 | h+ ura4-D18 ade6-210 leu1::pFS461 his7::pFS465 ade4-rLuc(NatMX) | this paper <sup>1</sup> |
| yFS970 | h- ura4-D18 leu1-32::pFS461 Z <sub>3</sub> EVpr:wee1(KanMX)     | this paper <sup>1</sup> |

1) These strains will be available from NRBP <[http://yeast.lab.nig.ac.jp/nig/index\\_en.html](http://yeast.lab.nig.ac.jp/nig/index_en.html)>.

**Table 2: Plasmids**

| Plasmid  | Description                                            | Reference               |
|----------|--------------------------------------------------------|-------------------------|
| DBY19011 | Z3EV CDS                                               | McIsaac                 |
| pMN9     | Z3EV promoter                                          | McIsaac                 |
| pFS470   | bLuc                                                   | lab stock               |
| pSO745   | GFP-NLS                                                | Oliferenko lab          |
| pFS108   | his7 integration plasmid                               | lab stock               |
| pFS181   | leu1 integration plasmid                               | lab stock               |
| pFS461   | leu1 integration plasmid with adh1pr:Z <sub>3</sub> EV | this paper <sup>1</sup> |
| pFS462   | his7 integration plasmid with Z <sub>3</sub> EVpr:GFP  | this paper <sup>1</sup> |
| pFS465   | his7 integration plasmid with Z <sub>3</sub> EVpr:bLuc | this paper <sup>1</sup> |
| pFS478   | KanMX Z <sub>3</sub> EV promoter cassette              | this paper <sup>1</sup> |

1) These plasmids will be available from AddGene <<http://www.addgene.org>>.

**Table 3: Primers**

| Primer | Sequence                                       |
|--------|------------------------------------------------|
| LD8    | ACGACGAACCGATTTACGAC                           |
| LD9    | TCAAATCCTTCCCTGCCTAA                           |
| LD10   | CATGTAATCGGGACCAAACC                           |
| MO191  | atgggcagggtcataaaca                            |
| MO192  | ccactggggtgatatttg                             |
| MO193  | cgtgactccaggccatact                            |
| MO197  | ATGAGATCCTCTAGAGTCGAC                          |
| MO198  | actctagaggatctcatATGGGTACCCGCCCATAT            |
| MO199  | acaaaagctggagctcCTACCCACCGTACTCGTCAAT          |
| MO200  | GAGCTCCAGCTTTTGTTT                             |
| MO218  | CTTCCTTCCATGGGGAATC                            |
| MO219  | agattcccatggaaggaagTTATATTGAATTTTCAAAAATTCTTAC |
| MO220  | ctttactcatTATAGTTTTTTCTCCTTGACG                |

MO221 aaaaaactataATGAGTAAAGGAGAAGAACTTTTC  
MO222 ttaaaccctaTTAAACCTTACGCTTCTTCTTAG  
MO223 taaggttaaTAGGGTTTAATGTAGAATAAATTCATATG  
MO224 attcctattgcaatgggcttTACTTCGTTTAAAAAGAAATAATTAATG  
MO225 AAGCCCATGCAATAGGAATC  
MO235 TATAGTTTTTTCTCCTTGACGTTAAAG  
MO236 tcaaggagaaaaactataATGCAGATTTTCGTCAAGACTTTGAC  
MO237 acgcttctttagggcccGCCACGGCGATCTTTCC  
MO238 GGCCTAAGAAGAAGCGTAAG  
MO233 TACATAACCTTCGGGCATGGCA  
MO269 CTCGCTCAACGAACGATTTGATA  
MO272 CTCGTATTGGGCGCCAGGGTGGTTTT

---

## REFERENCES

- Apolinario, E., Nocero, M., Jin, M., and Hoffman, C.S. (1993). Cloning and manipulation of the *Schizosaccharomyces pombe* *his7+* gene as a new selectable marker for molecular genetic studies. *Curr. Genet.* *24*, 491–495.
- Basi, G., Schmid, E., and Maundrell, K. (1993). TATA box mutations in the *Schizosaccharomyces pombe* *nmt1* promoter affect transcription efficiency but not the transcription start point or thiamine repressibility. *Elsevier Sci. Publ.* *123*, 131–136.
- Bellemare, D.R., Sanschagrin, M., Beaudoin, J., and Labbe, S. (2001). A novel copper-regulated promoter system for expression of heterologous proteins in *Schizosaccharomyces pombe*. *Gene* *273*, 191–198.
- Berger, S.L., Piña, B., Silverman, N., Marcus, G. a, Agapite, J., Regier, J.L., Triezenberg, S.J., and Guarente, L. (1992). Genetic isolation of ADA2: a potential transcriptional adaptor required for function of certain acidic activation domains. *Cell* *70*, 251–265.
- Bitton, D.A., Schubert, F., Dey, S., Okoniewski, M., Smith, G.C., Khadayate, S., Pancaldi, V., Wood, V., and Bähler, J. (2015). AnGeLi: A tool for the analysis of gene lists from fission yeast. *Front. Genet.* *6*, 1–9.
- DeLean, A., Munson, P.J., and Rodbard, D. (1978). Simultaneous analysis of families of sigmoidal curves: application to bioassay, radioligand assay, and physiological dose-response curves. *Am. J. Physiol.* *235*, E97–E102.
- Faryar, K., and Gatz, C. (1992). Construction of a Tetracycline-inducible promoter in *Schizosaccharomyces pombe*. *Curr. Genet.* *21*, 345–349.
- Forsburg, S.L. (1993). Comparison of *Schizosaccharomyces pombe* systems expression. *Nucleic Acids Res.* *21*, 2955–2956.
- Forsburg, S.L., and Rhind, N. (2006). Basic methods for fission yeast. *Yeast* *23*, 173–183.
- Fujita, Y., Tohda, H., Giga-Hama, Y., and Takegawa, K. (2006). Heat shock-inducible expression vectors for use in *Schizosaccharomyces pombe*. *FEMS Yeast Res.* *6*, 883–887.
- Gupta, R.S. (1995). Phylogenetic analysis of the 90 kD heat shock family of protein sequences and an examination of the relationship among animals, plants, and fungi species. *Mol Biol Evol* *12*, 1063–1073.
- Heim, R., Prasher, D.C., and Tsien, R.Y. (1994). Wavelength mutations and posttranslational autoxidation of green fluorescent protein. *Proc. Natl. Acad. Sci.* *91*, 12501–12504.
- Iacovoni, J.S., Russell, P., and Gaits, F. (1999). A new inducible protein expression system in fission yeast based on the glucose-repressed *inv1* promoter. *Gene* *232*, 53–58.
- Matsuyama, A., Shirai, A., and Yoshida, M. (2008). A series of promoters for constitutive expression of heterologous genes in fission yeast. *Yeast* *25*, 371–376.
- McIsaac, R.S., Silverman, S.J., McClean, M.N., Gibney, P.A., Macinskas, J., Hickman, M.J.,



- Petti, A.A., and Botstein, D. (2011). Fast-acting and nearly gratuitous induction of gene expression and protein depletion in *Saccharomyces cerevisiae*. *Mol. Biol. Cell* 22, 4447–4459.
- McIsaac, R.S., Oakes, B.L., Wang, X., Dummit, K. a., Botstein, D., and Noyes, M.B. (2013). Synthetic gene expression perturbation systems with rapid, tunable, single-gene specificity in yeast. *Nucleic Acids Res.* 41, 1–10.
- McIsaac, R.S., Gibney, P.A., Chandran, S.S., Benjamin, K.R., and Botstein, D. (2014). Synthetic biology tools for programming gene expression without nutritional perturbations in *Saccharomyces cerevisiae*. *Nucleic Acids Res.* 42, 1–8.
- Nurse, P. (1990). Universal Control Regulating the Onset of M-phase.pdf. *Nature* 344, 503–508.
- Prentice, H.L., and Kingston, R.E. (1992). Mammalian promoter element function in the fission yeast *Schizosaccharomyces pombe*. *Nucleic Acids Res* 20, 3383–3390.
- Remacle, J.E., Albrecht, G., Brys, R., Braus, G.H., and Huylebroeck, D. (1997). Three classes of mammalian transcription activation domain stimulate transcription in *Schizosaccharomyces pombe*. *EMBO J.* 16, 5722–5729.
- Russell, P., and Nurse, P. (1984). *c* & 25 + Functions as an Inducer in the M itotic Control of Fission Yeast. *Cell* 45, 145–153.
- Russell, P., and Nurse, P. (1987). Negative regulation of mitosis by *wee1+*, a gene encoding a protein kinase homologue. *Cell* 49, 559–567.
- Russell, P.R., and Hall, B.D. (1983). The primary structure of the alcohol dehydrogenase gene from the fission yeast *Schizosaccharomyces pombe*. *J Biol.Chem.* 258, 143–149.
- Schweingruber, M.E., Edenharter, E., Zurlinden, a, and Stockmaier, K.M. (1992). Regulation of *pho1*-encoded acid phosphatase of *Schizosaccharomyces pombe* by adenine and phosphate. *Curr. Genet.* 22, 289–292.
- Silverman, N., Agapite, J., and Guarente, L. (1994). Yeast ADA2 protein binds to the VP16 protein activation domain and activates transcription. *Proc. Natl. Acad. Sci. U. S. A.* 91, 11665–11668.
- Sipiczki, M. (2000). Where does fission yeast sit on the tree of life? *Genome Biol.* 1, 1011.1-1011.4.
- Sivakumar, S., Porter-Goff, M., Patel, P.K., Benoit, K., and Rhind, N. (2004). In vivo labeling of fission yeast DNA with thymidine and thymidine analogs. *Methods* 33, 213–219.
- Swaminathan, S., Malhotra, P., Manohar, C.F., Dhar, R., and Thimmapaya, B. (1993). Activation of a dual adenovirus promoter containing nonconsensus TATA motifs in *Schizosaccharomyces pombe*: role of TATA sequences in the efficiency of transcription. *Nucleic Acids Res.* 21, 2737–2746.
- Toyama, R., and Okayama, H. (1990). Human chorionic gonadotropin alpha and human cytomegalovirus promoters are extremely active in the fission yeast *Schizosaccharomyces pombe*. *FEBS Lett.* 268, 217–221.

- Toyama, R., Bende, S.M., and Dhar, R. (1992). Transcriptional activity of the human immunodeficiency virus-1 LTR promoter in fission yeast *Schizosaccharomyces pombe*. *Nucleic Acids Res* 20, 2591–2596.
- Trapnell, C., Pachter, L., and Salzberg, S.L. (2009). TopHat: Discovering splice junctions with RNA-Seq. *Bioinformatics* 25, 1105–1111.
- Verma, H.K., Shukla, P., Alfatah, M., Khare, A.K., Upadhyay, U., Ganesan, K., and Singh, J. (2014). High level constitutive expression of luciferase reporter by *lsd90* promoter in fission yeast. *PLoS One* 9, 1–10.
- Voon, D.C., Subrata, L.S., Baltic, S., Leu, M.P., Whiteway, J.M., Wong, A., Knight, S.A., Christiansen, F.T., and Daly, J.M. (2005a). Use of mRNA- and protein-destabilizing elements to develop a highly responsive reporter system. *Nucleic Acids Res.* 33, 1–10.
- Voon, D.C., Subrata, L.S., Baltic, S., Leu, M.P., Whiteway, J.M., Wong, A., Knight, S.A., Christiansen, F.T., and Daly, J.M. (2005b). Use of mRNA- and protein-destabilizing elements to develop a highly responsive reporter system. 33.
- Watson, A.T., Daigaku, Y., Mohebi, S., Etheridge, T.J., Chahwan, C., Murray, J.M., and Carr, A.M. (2013). Optimisation of the *Schizosaccharomyces pombe* *urg1* expression system. *PLoS One* 8.
- Watt, S., Mata, J., López-Maury, L., Marguerat, S., Burns, G., and Bähler, J. (2008). *urg1*: A uracil-regulatable promoter system for fission yeast with short induction and repression times. *PLoS One* 3, 1–8.

## SUPPLEMENTAL INFORMATION

**Table S1: *S. pombe* promoter systems**

| Promoter     | Characteristics              | Reference                                         |
|--------------|------------------------------|---------------------------------------------------|
| adh1         | Strong, constitutive         | (Russell and Hall, 1983; Russell and Nurse, 1984) |
| ef1a-c       | Strong, constitutive         | (Matsuyama et al., 2008)                          |
| hCG $\alpha$ | Strong, constitutive         | (Toyama and Okayama, 1990)                        |
| hCMV         | Strong, constitutive         | (Toyama and Okayama, 1990)                        |
| hAd E2 early | Strong, constitutive         | (Swaminathan et al., 1993)                        |
| HIV-1 LTR    | Strong, constitutive         | (Toyama et al., 1992)                             |
| hHSP70       | Strong, constitutive         | (Prentice and Kingston, 1992)                     |
| isd90        | Strong, constitutive         | (Verma et al., 2014)                              |
| tif51        | Strong, constitutive         | (Matsuyama et al., 2008)                          |
| cam1         | Weak, constitutive           | (Matsuyama et al., 2008)                          |
| SV40         | Weak, constitutive           | (Forsburg, 1993)                                  |
| pho1         | Adenine repressible          | (Schweingruber et al., 1992)                      |
| ctr4         | Copper repressible           | (Bellemare et al., 2001)                          |
| inv1         | Glucose repressible          | (Iacovoni et al., 1999)                           |
| hsp16        | Stress inducible             | (Fujita et al., 2006)                             |
| tetO/CaMV    | Weak, tetracycline inducible | (Faryar and Gatz, 1992; Forsburg, 1993)           |
| nmt1         | Weak-Strong inducible        | (Basi et al., 1993)                               |
| urg1         | Medium ura inducible         | (Watt et al., 2008)                               |

# Ohira, M. Figure 1.

bioRxiv preprint doi: <https://doi.org/10.1101/092338>; this version posted December 7, 2016. The copyright holder for this preprint (which was not certified by peer review) is the author/funder, who has granted bioRxiv a license to display the preprint in perpetuity. It is made available under aCC-BY-NC-ND 4.0 International license.

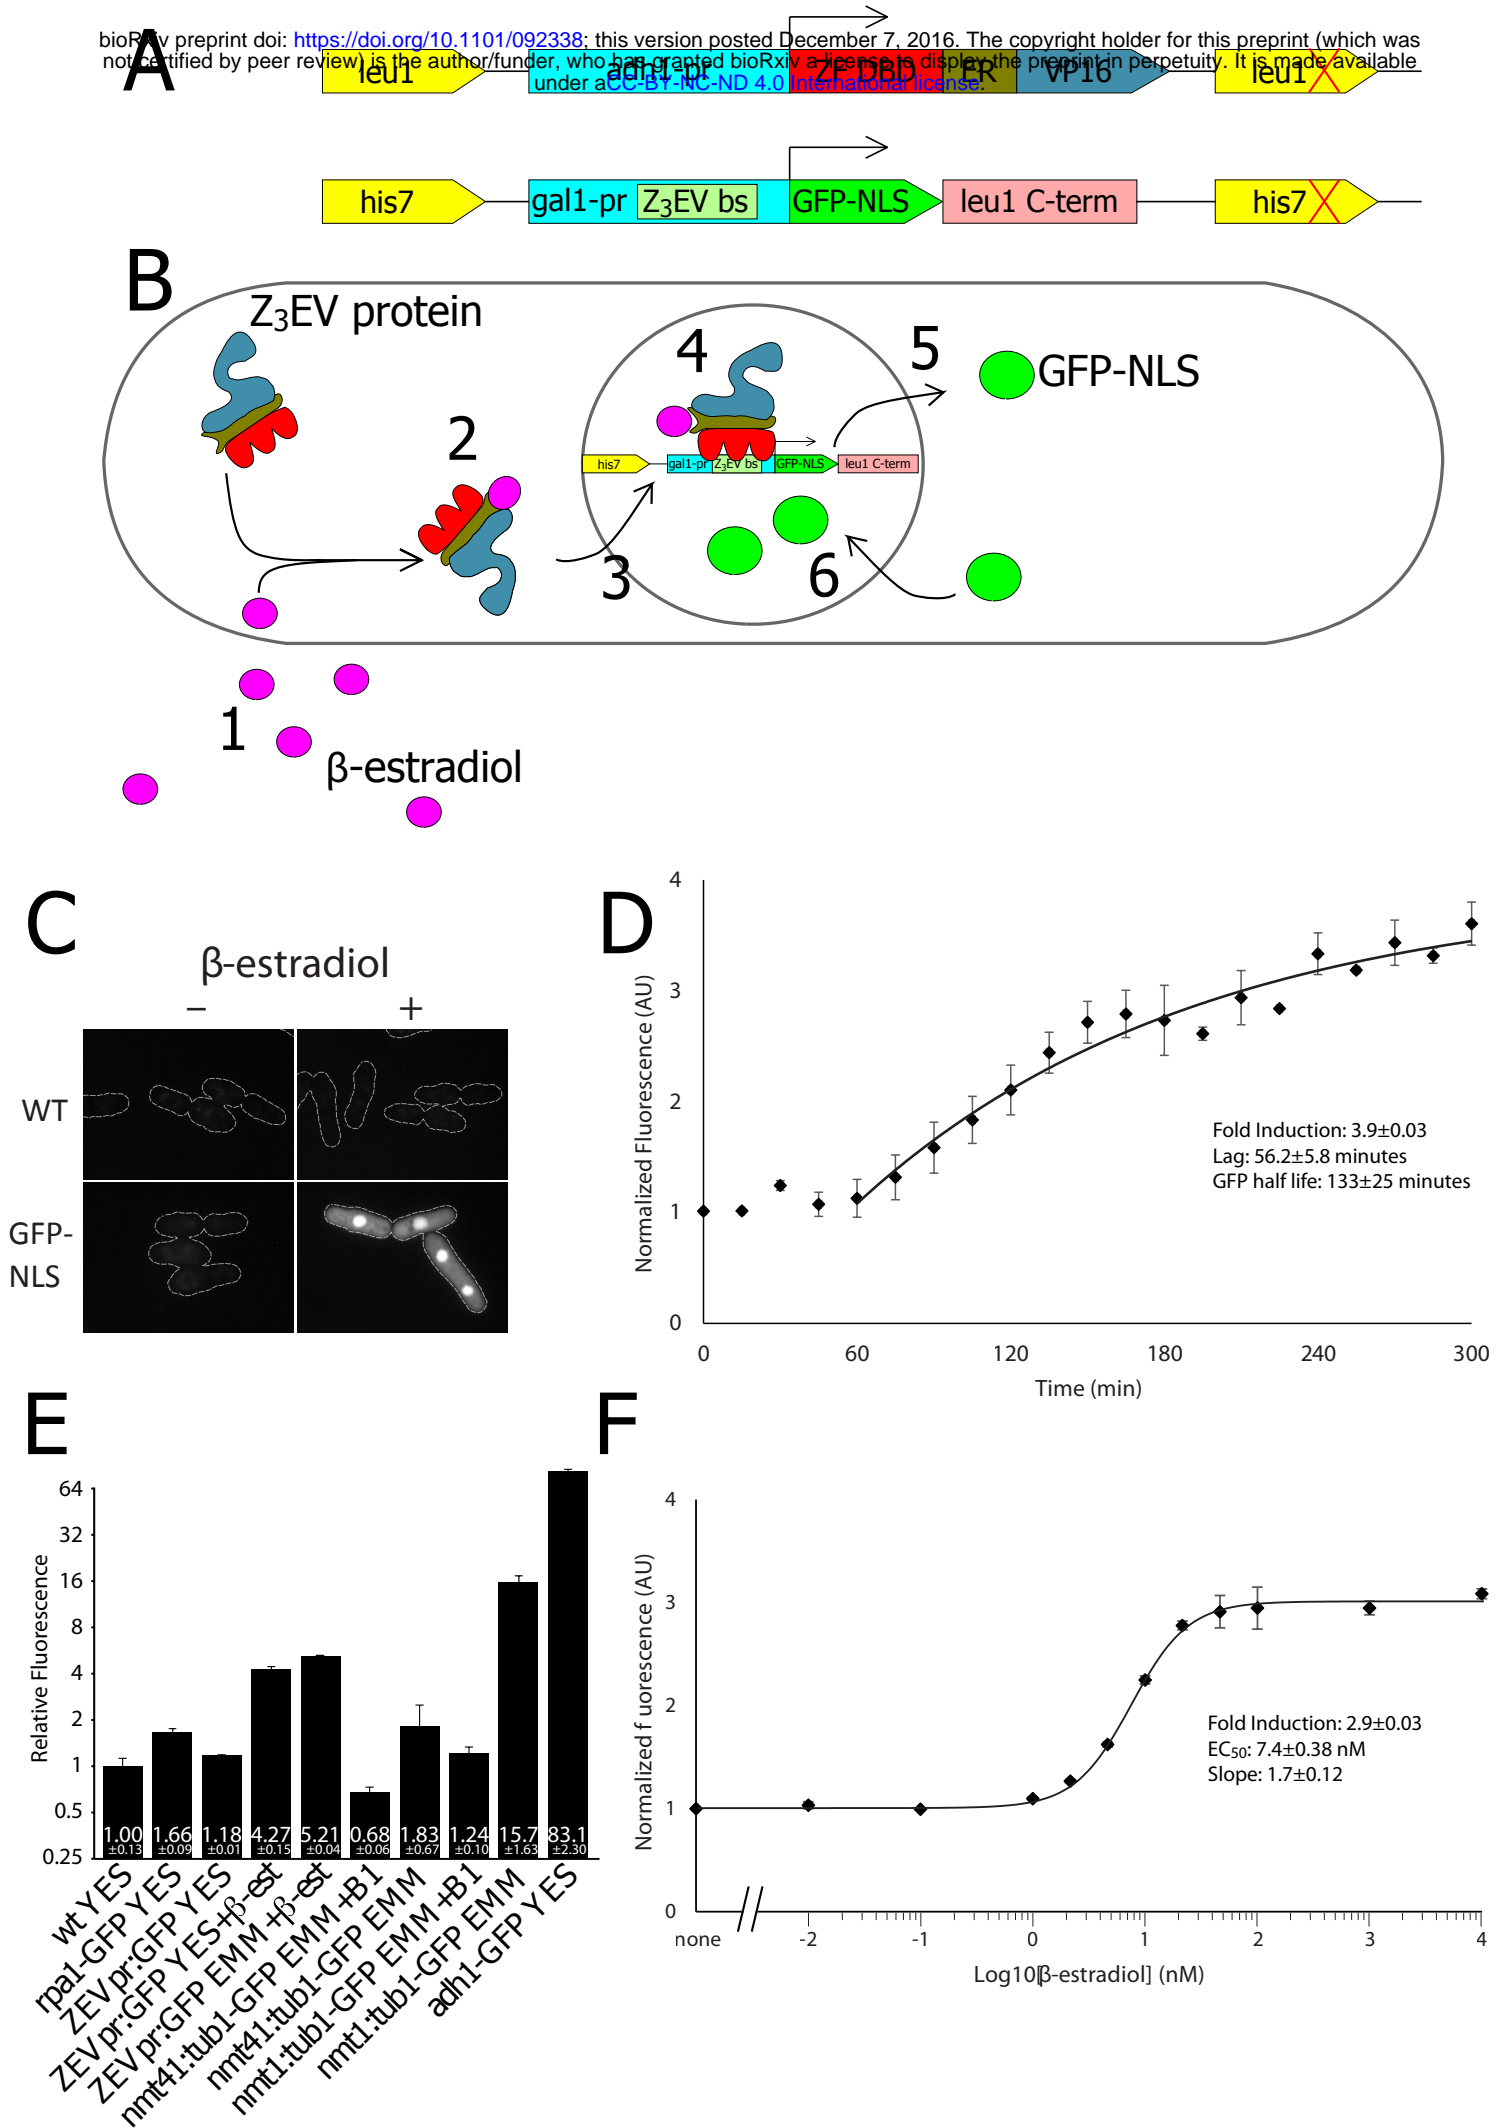

# Ohira, M. Figure 2.

bioRxiv preprint doi: <https://doi.org/10.1101/092338>; this version posted December 7, 2016. The copyright holder for this preprint (which was not certified by peer review) is the author/funder, who has granted bioRxiv a license to display the preprint in perpetuity. It is made available under aCC-BY-NC-ND 4.0 International license.

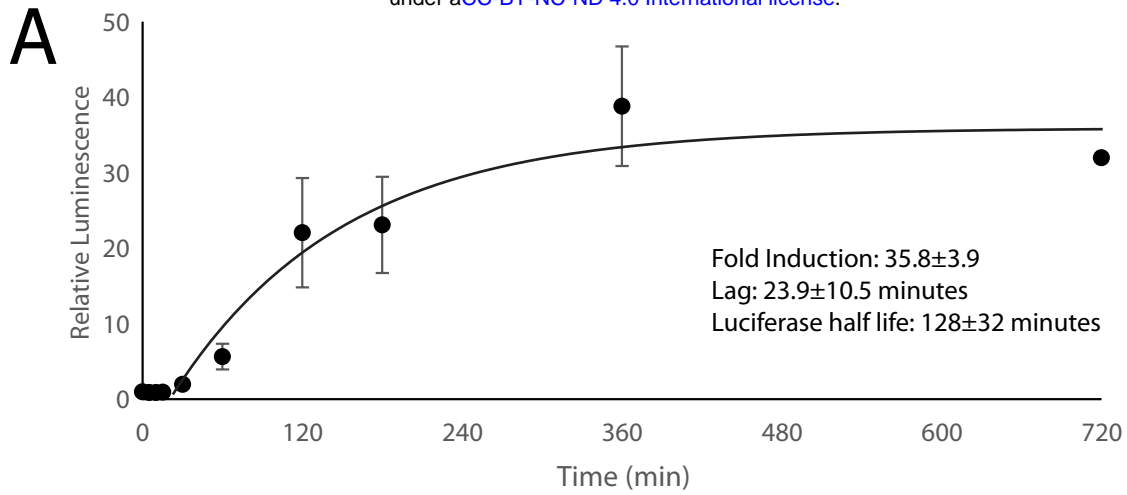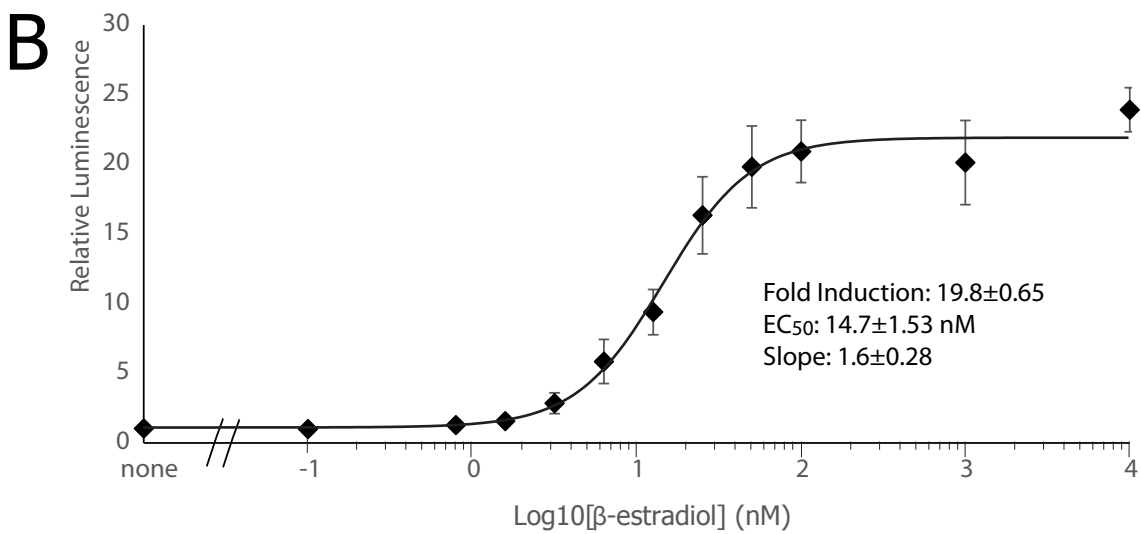

# Ohira, M. Figure 3.

bioRxiv preprint doi: <https://doi.org/10.1101/092338>; this version posted December 7, 2016. The copyright holder for this preprint (which was not certified by peer review) is the author/funder, who has granted bioRxiv a license to display the preprint in perpetuity. It is made available under aCC-BY-NC-ND 4.0 International license.

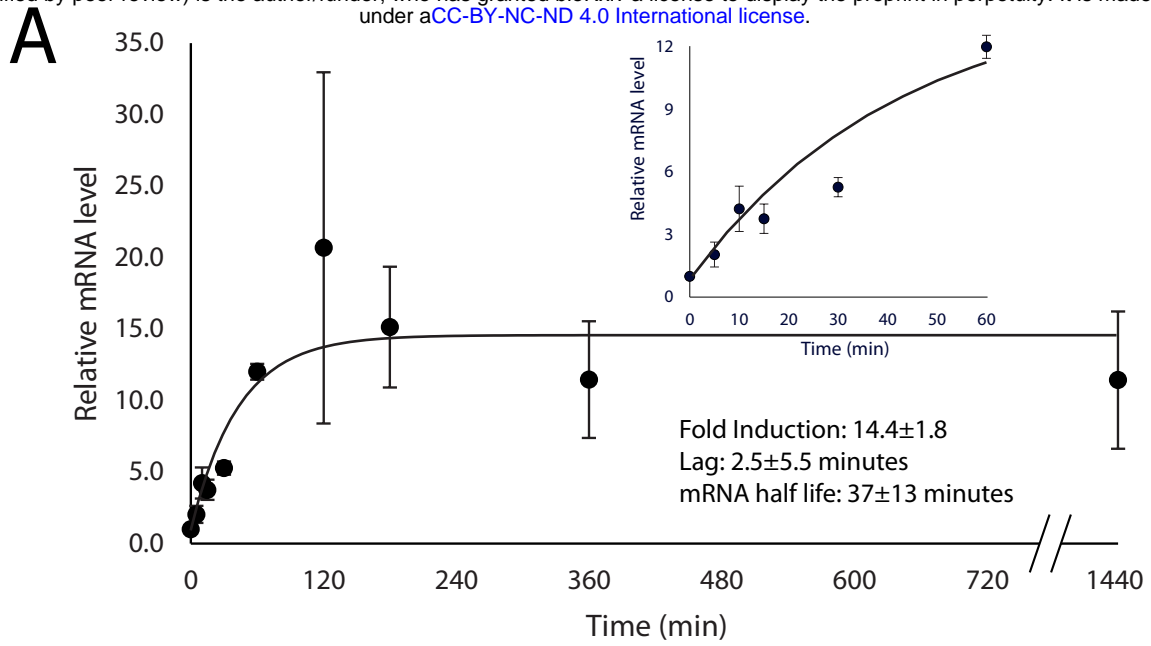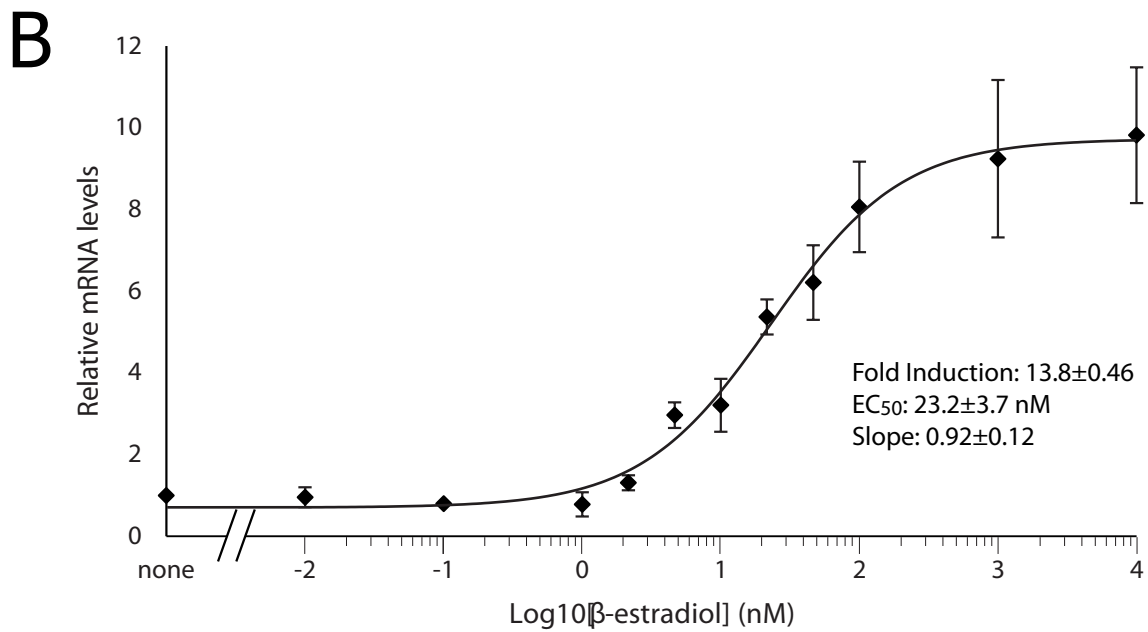

# Ohira, M. Figure 4.

## A

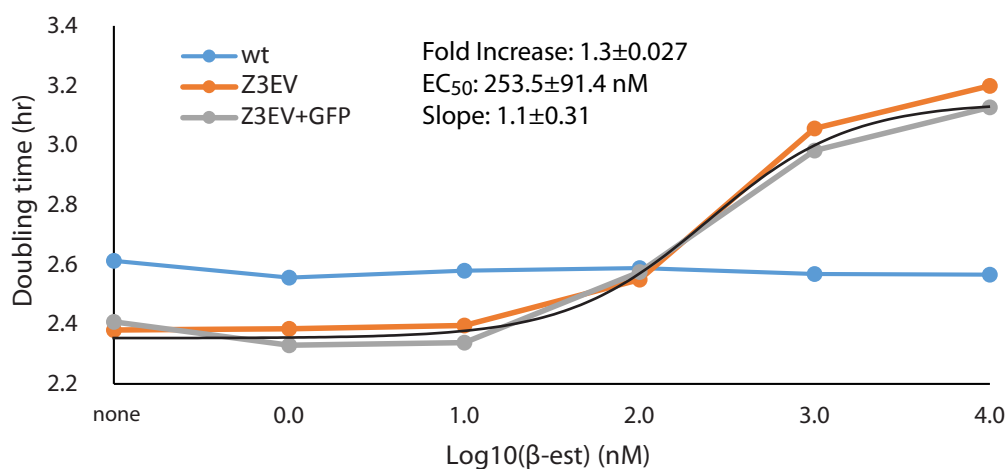

## B

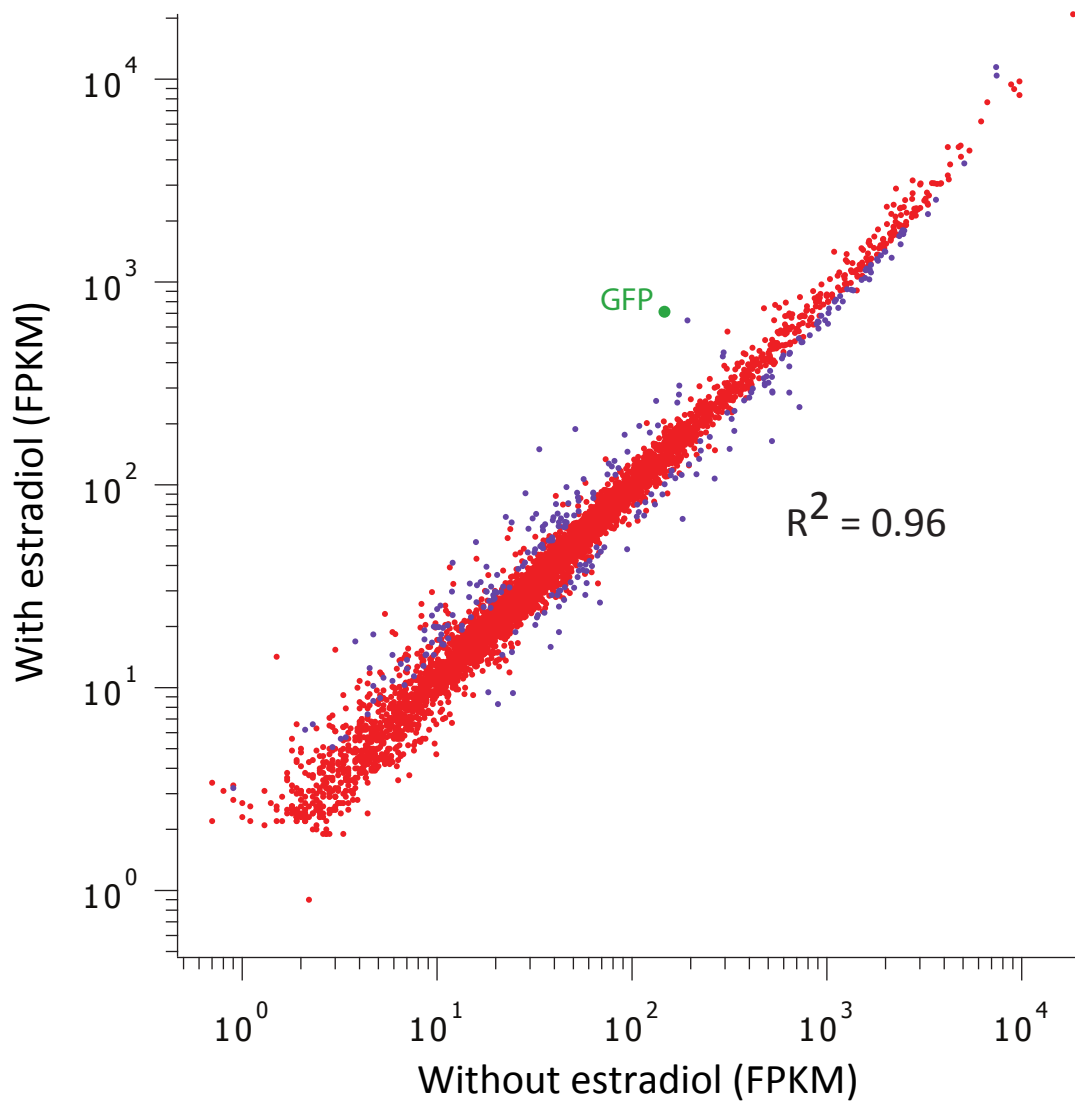

# Ohira, M. Figure 5.

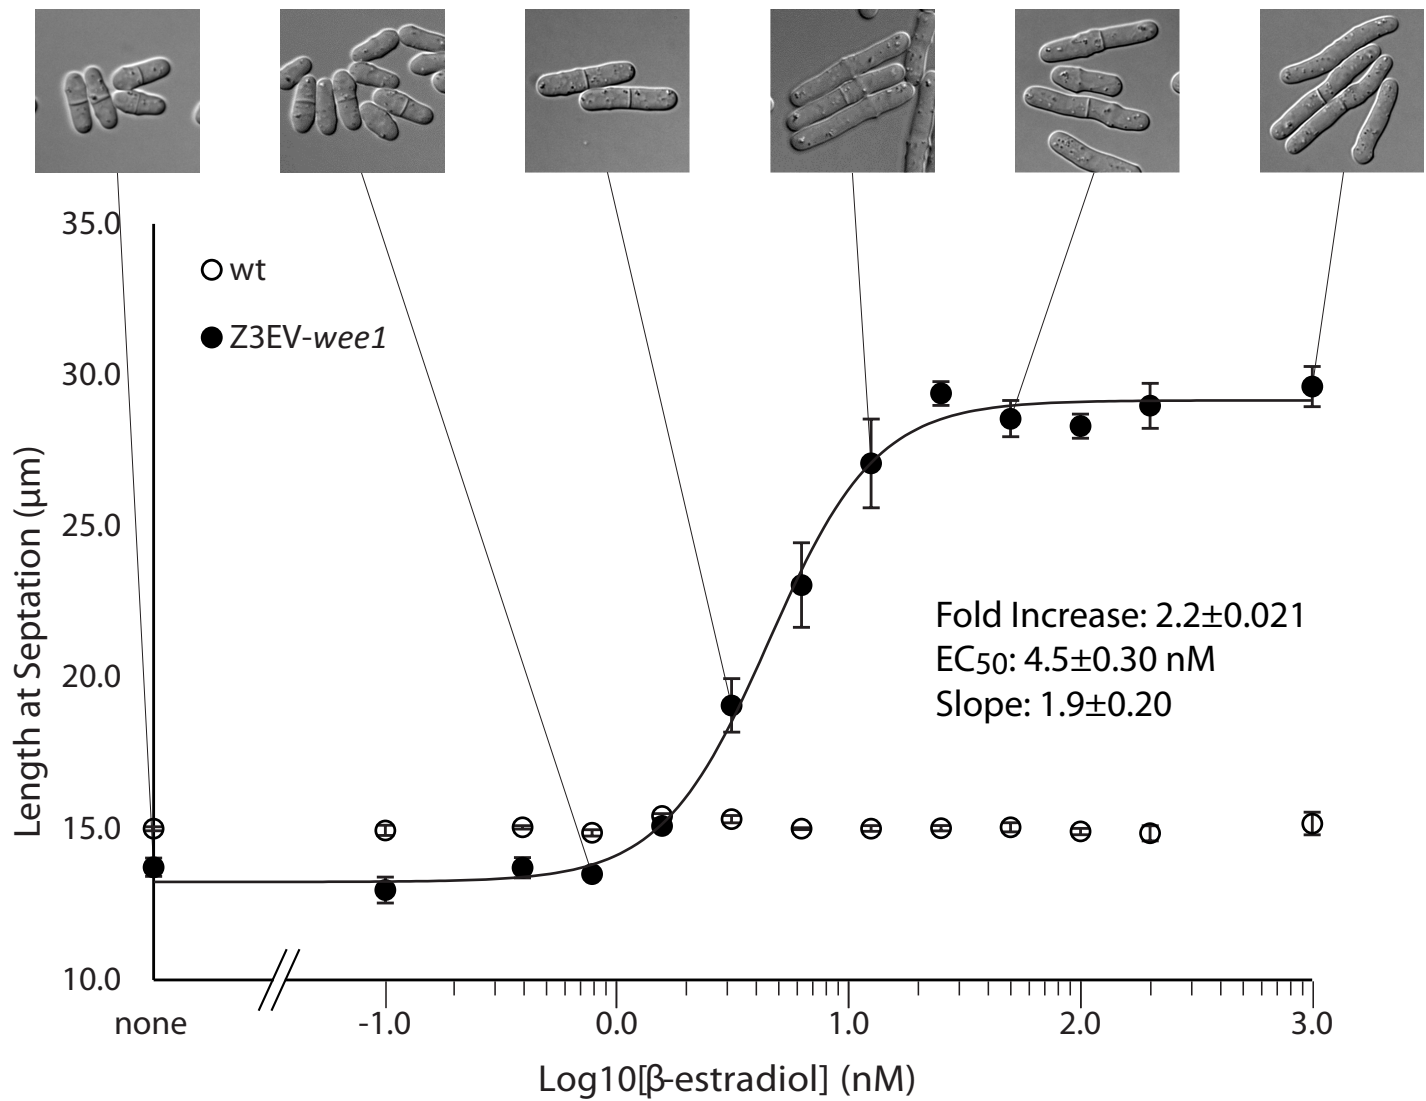

Source: http://biorxiv.org/content/10.1101/092338v1.full.pdf
